# Supplementary material for: Treatment-seeking behaviour and associated costs for malaria in Papua, Indonesia
Source: Springer Nature journal article supplement (doi:10.1186/s12936-016-1588-8), 2016-11-07

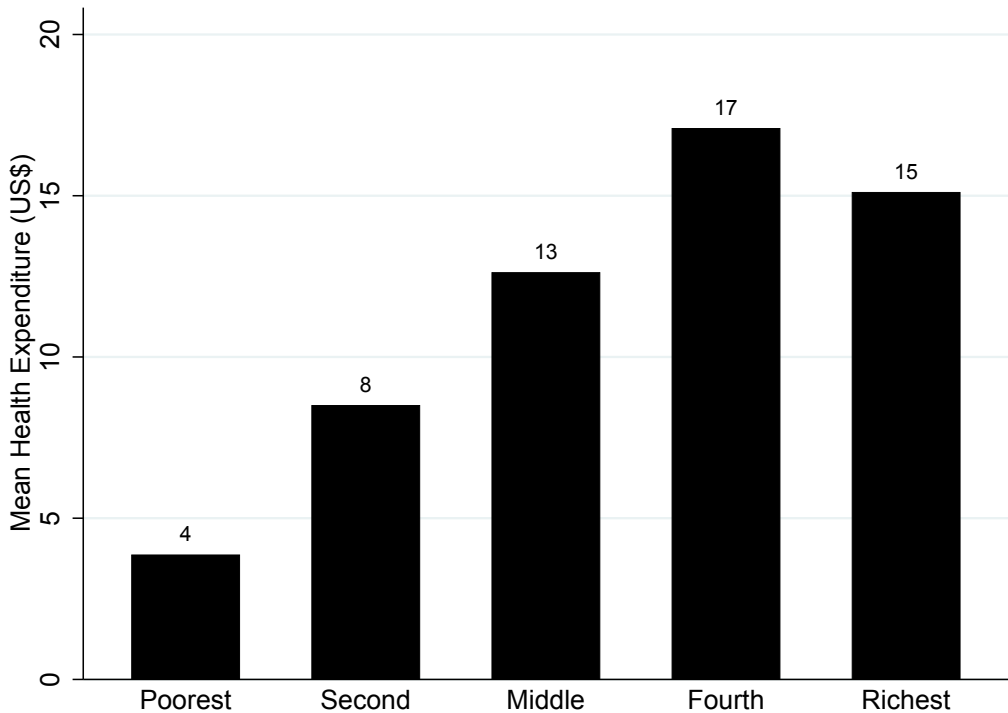

Supplement: MOESM2 [file 11029228]
